# Supplementary material for: Brazilian guidelines for the pharmacological treatment of idiopathic pulmonary fibrosis. Official document of the Brazilian Thoracic Association based on the GRADE methodology
Source: PubMed Central journal article supplement — J Bras Pneumol. 2020 Mar-Apr;46(2):e20190423. doi: 10.36416/1806-3756/e20190423 (PMC7462709; doi:10.36416/1806-3756/e20190423), 2020
Supplement: 1806-3713-jbpneu-46-02-e20190423-suppl1.pdf [file 1806-3713-jbpneu-46-02-e20190423-suppl1.pdf]

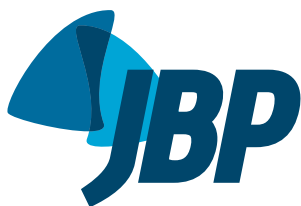

# Brazilian guidelines for the pharmacological treatment of idiopathic pulmonary fibrosis. Official document of the Brazilian Thoracic Association based on the GRADE methodology

José Baddini-Martinez<sup>1,2</sup> , Juliana Ferreira<sup>3</sup> , Suzana Tanni<sup>4</sup> , Luis Renato Alves<sup>1</sup> , Benedito Francisco Cabral Junior<sup>5</sup> , Carlos Roberto Ribeiro Carvalho<sup>3</sup> , Talita Jacon Cezare<sup>4</sup> , Claudia Henrique da Costa<sup>6</sup> , Marcelo Basso Gazzana<sup>7</sup> , Sérgio Jezler<sup>8</sup> , Ronaldo Adib Kairalla<sup>3</sup> , Leticia Kawano-Dourado<sup>9</sup> , Mariana Silva Lima<sup>10</sup> , Eliane Mancuzo<sup>11</sup> , Maria Auxiliadora Carmo Moreira<sup>12</sup> , Marcelo Palmeira Rodrigues<sup>13</sup> , Silvia Carla Sousa Rodrigues<sup>14</sup> , Adalberto Sperb Rubin<sup>15</sup> , Rogério Lopes Rufino<sup>6</sup> , Leila John Marques Steidle<sup>16</sup> , Karin Storrer<sup>17</sup> , Bruno Guedes Baldi<sup>3</sup> 

**Chart S1.** Declaration of conflicts of interest of the authors of the guidelines.<sup>a</sup>

| Name                             | Commercial interest(s) with which the author has some connection                    |
|----------------------------------|-------------------------------------------------------------------------------------|
| Adalberto Sperb Rubin            | AstraZeneca, Boehringer Ingelheim, Celgene, Chiesi, Eurofarma, GSK, Novartis, Roche |
| Benedito Francisco Cabral Júnior | AstraZeneca, Boehringer Ingelheim, Chiesi, Novartis                                 |
| Bruno Guedes Baldi               | Boehringer Ingelheim, Celgene                                                       |
| Carlos Roberto Ribeiro Carvalho  | None                                                                                |
| Claudia Henrique da Costa        | Actelion, AstraZeneca, Boehringer Ingelheim, Chiesi, GSK, Novartis, Roche           |
| Eliane Mancuzo                   | Boehringer Ingelheim, Pfizer, Roche                                                 |
| José Baddini-Martinez            | Boehringer Ingelheim, Roche                                                         |
| Juliana Ferreira                 | None                                                                                |
| Karin Storrer                    | Boehringer Ingelheim, Roche                                                         |
| Leila John Marques               | Bayer, Boehringer Ingelheim, Roche                                                  |
| Leticia Kawano-Dourado           | Boehringer Ingelheim, Bristol-Myers-Squibb, Roche                                   |
| Luis Renato Alves                | Boehringer Ingelheim, Chiesi, Roche                                                 |
| Marcelo Basso Gazzana            | Actelion, Bayer, Boehringer Ingelheim, Jansen                                       |
| Marcelo Palmeira Rodrigues       | Boehringer Ingelheim, Roche                                                         |
| Maria Auxiliadora Carmo Moreira  | Boehringer Ingelheim, Roche                                                         |
| Mariana Silva Lima               | Boehringer Ingelheim, Roche                                                         |
| Rogério Lopes Rufino Alves       | Actelion, Bayer, Boehringer Ingelheim, Roche                                        |
| Ronaldo Adib Kairalla            | Boehringer Ingelheim, Roche                                                         |
| Sérgio Jezler                    | Boehringer Ingelheim, Roche                                                         |
| Silvia Carla Sousa Rodrigues     | ALPHARAD, Boehringer Ingelheim, Roche                                               |
| Suzana Tanni                     | AstraZeneca                                                                         |
| Talita Jacon Cezare              | Roche                                                                               |

<sup>a</sup>Regarding the 24 months preceding the writing of the document. interested parties can request additional information by contacting the Secretariat of the *Jornal Brasileiro de Pneumologia*.

**Chart S2.** Primary and secondary criteria used in the search for articles in the PubMed and EMBASE databases.

| Primary criteria                                                                            | Secondary criteria                                                                                                                                                                                                                                                                                                                                                                                                                                                                                                                  |
|---------------------------------------------------------------------------------------------|-------------------------------------------------------------------------------------------------------------------------------------------------------------------------------------------------------------------------------------------------------------------------------------------------------------------------------------------------------------------------------------------------------------------------------------------------------------------------------------------------------------------------------------|
| Pulmonary fibrosis, idiopathic<br>OR idiopathic pulmonary<br>fibrosis OR pulmonary fibrosis | - Nintedanib<br>- Pirfenidone<br>- Sildenafil OR PDF-5 inhibitors OR phosphodiesterase type 5 inhibitors OR phosphodiesterase inhibiting drugs<br>- Bosentan OR macitentan OR ambrisentan OR endothelin receptor antagonists<br>- Treatment of gastroesophageal reflux OR gastroesophageal reflux therapy OR acid suppression therapy OR anti-acid OR proton pump inhibitor<br>- N-acetylcysteine OR acetylcysteine<br>- Corticosteroid OR corticosteroids OR glucocorticoids OR glucocorticoid OR prednisone OR methylprednisolone |

**Chart S3.** Committee member vote counts on the recommendations for each question of the guidelines.

| Question                                                                                           | Voting members (n) | Result                                        |
|----------------------------------------------------------------------------------------------------|--------------------|-----------------------------------------------|
| 1. Should we recommend the use of nintedanib for patients with IPF?                                | 19                 | Unanimous for a recommendation                |
| 2. Should we recommend the use of pirfenidone for patients with IPF?                               | 19                 | Unanimous for a recommendation                |
| 3. Should we recommend the use of phosphodiesterase-5 inhibitors for patients with IPF?            | 19                 | 17 for a suggestion<br>2 for a recommendation |
| 4. Should we recommend the use of endothelin-receptor antagonists for patients with IPF?           | 19                 | Unanimous for a recommendation                |
| 5. Should we recommend pharmacological treatment of gastroesophageal reflux for patients with IPF? | 19                 | Unanimous for a recommendation                |
| 6. Should we recommend the use of N-acetylcysteine for patients with IPF?                          | 19                 | Unanimous for a recommendation                |
| 7. Should we recommend the use of corticosteroids for patients with IPF?                           | 19                 | Unanimous for a recommendation                |

IPF: idiopathic pulmonary fibrosis.

Question 1

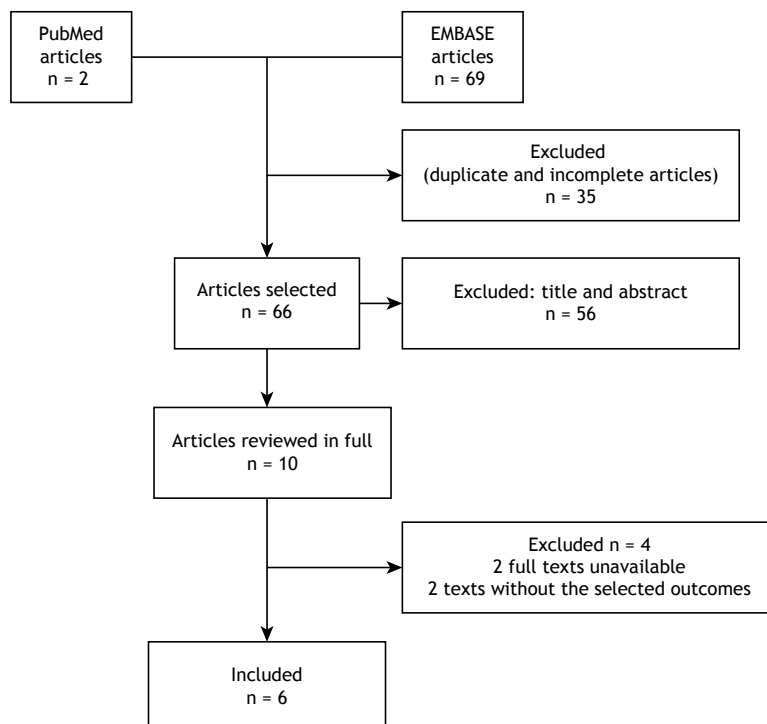

**Figure S1.** Summary of the article selection process, in accordance with the Preferred Reporting Items for Systematic Reviews and Meta-Analyses protocol, for question 1 (regarding the use of nintedanib).

Question 2

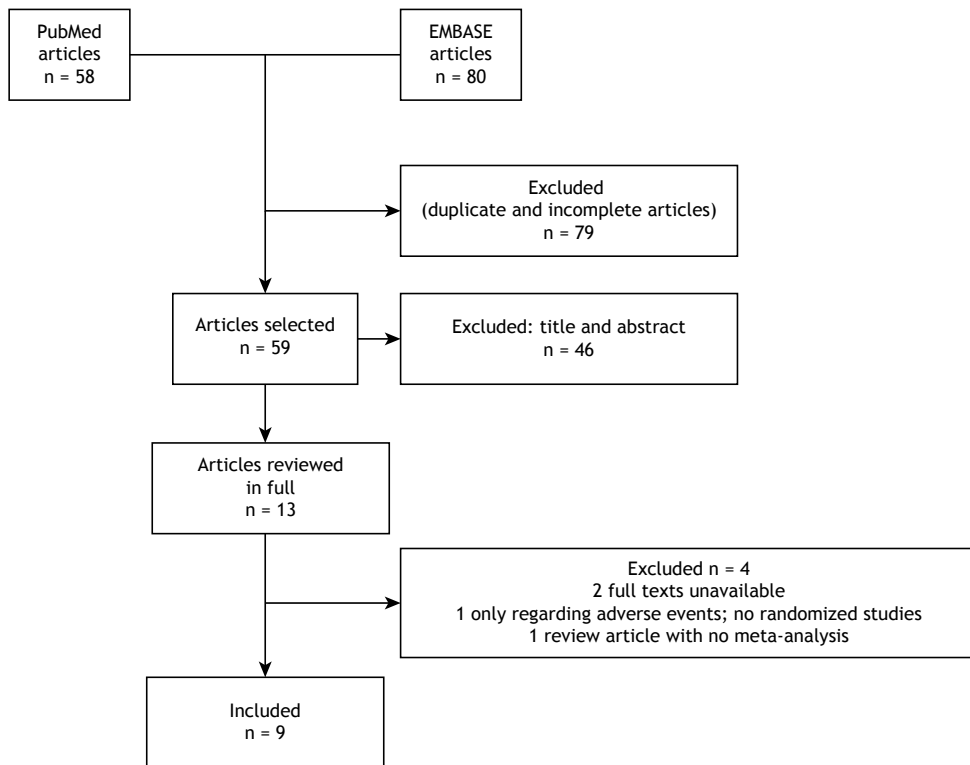

**Figure S2.** Summary of the article selection process, in accordance with the Preferred Reporting Items for Systematic Reviews and Meta-Analyses protocol, for question 2 (regarding the use of pirfenidone).

Question 3

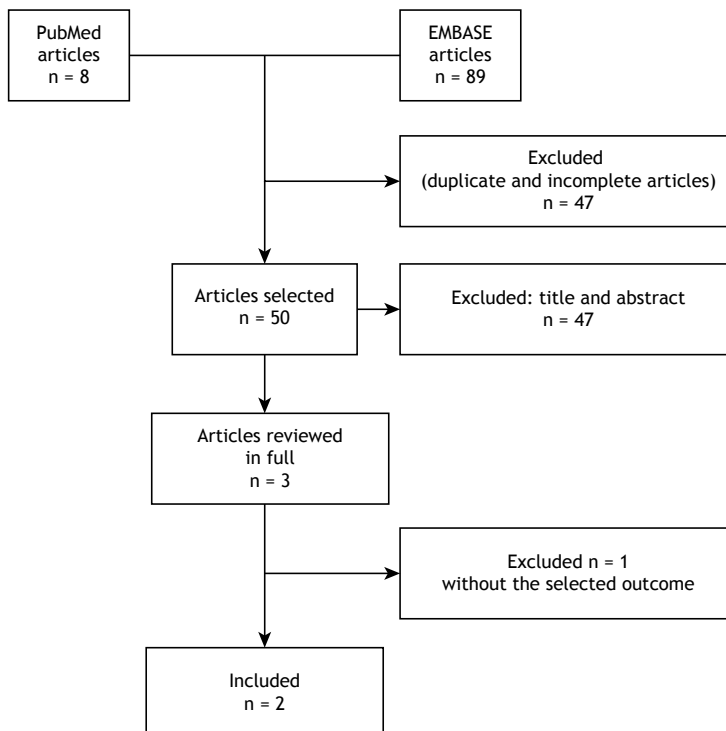

**Figure S3.** Summary of the article selection process, in accordance with the Preferred Reporting Items for Systematic Reviews and Meta-Analyses protocol, for question 3 (regarding the use of phosphodiesterase-5 inhibitors).

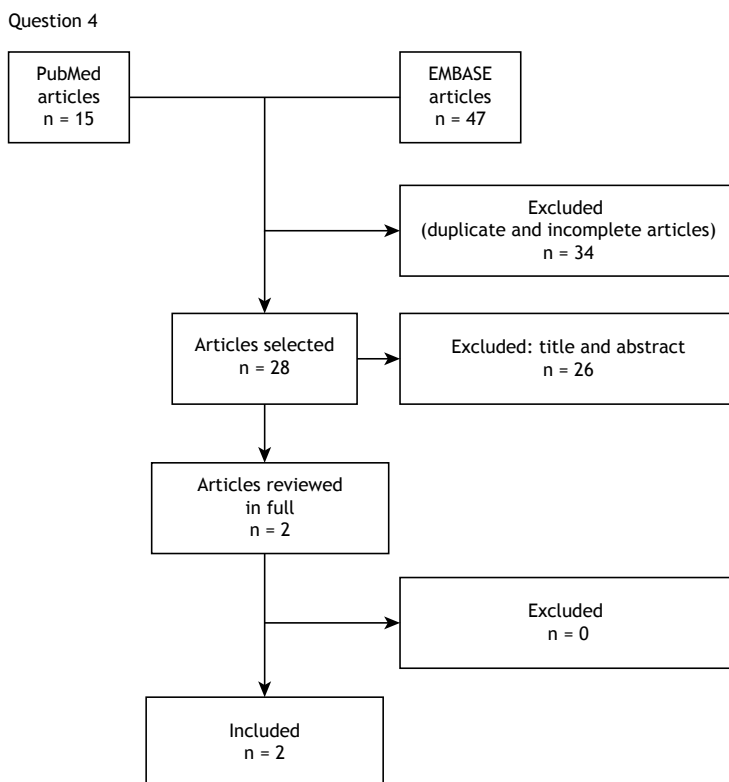

**Figure S4.** Summary of the article selection process, in accordance with the Preferred Reporting Items for Systematic Reviews and Meta-Analyses protocol, for question 4 (regarding the use of endothelin-receptor antagonists).

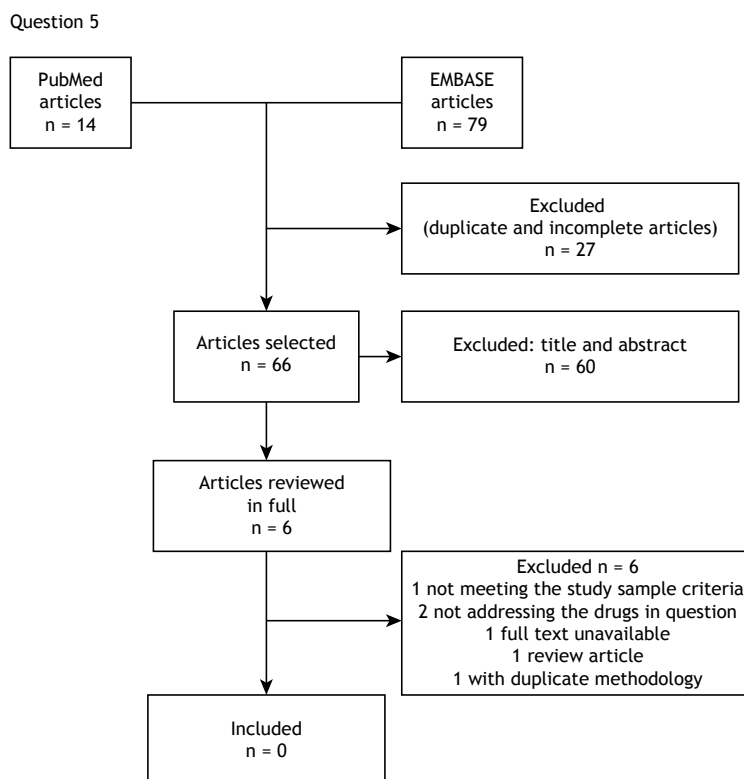

**Figure S5.** Summary of the article selection process, in accordance with the Preferred Reporting Items for Systematic Reviews and Meta-Analyses protocol, for question 5 (regarding the routine pharmacological treatment of gastroesophageal reflux).

Question 6

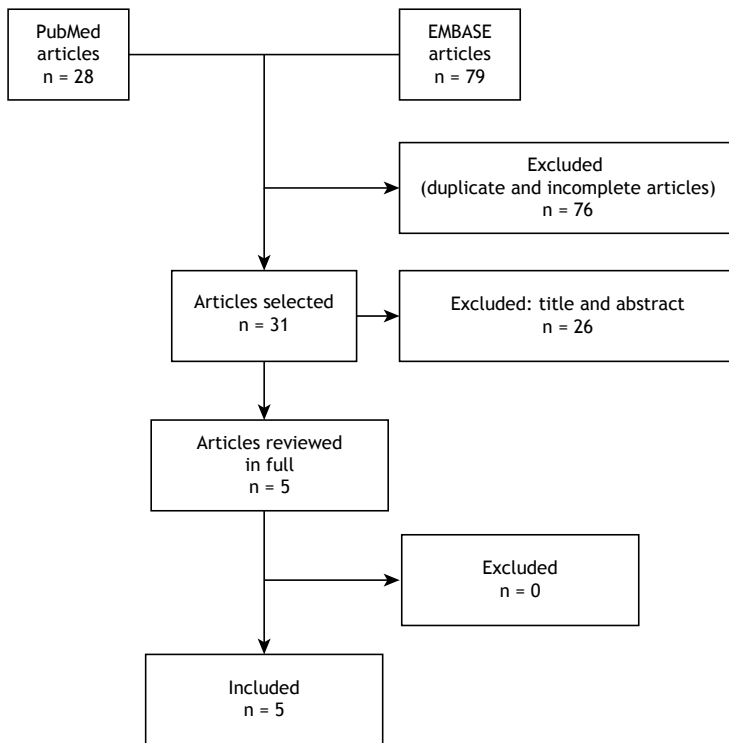

**Figure S6.** Summary of the article selection process, in accordance with the Preferred Reporting Items for Systematic Reviews and Meta-Analyses protocol, for question 6 (regarding the use of N-acetylcysteine).

Question 7

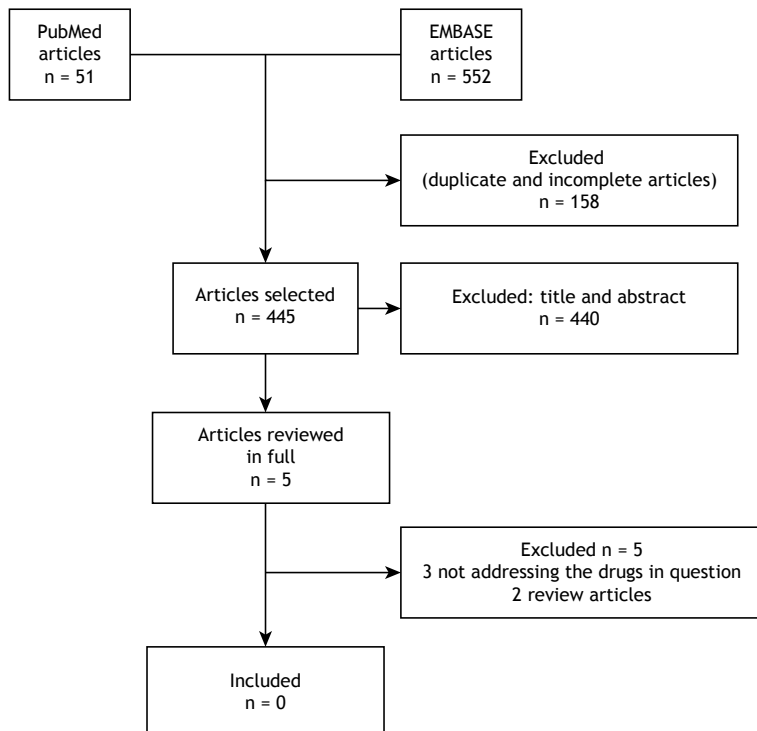

**Figure S7.** Summary of the article selection process, in accordance with the Preferred Reporting Items for Systematic Reviews and Meta-Analyses protocol, for question 7 (regarding the use of corticosteroids).

**Table S1.** Summary of the quality of the evidence of the articles selected for question 1 (regarding the use of nintedanib).

| Article, n                                   | Study design | Certainty assessment |               |             | Indirect evidence    | Imprecision | Other remarks   | Nintedanib      | Placebo          | Effect size              |                   | Certainty     | Importance |
|----------------------------------------------|--------------|----------------------|---------------|-------------|----------------------|-------------|-----------------|-----------------|------------------|--------------------------|-------------------|---------------|------------|
|                                              |              | Bias risk            | Inconsistency | Publication |                      |             |                 |                 |                  | Relative OR (95% CI)     | Absolute (95% CI) |               |            |
| Mortality (follow-up period: 12 months)      |              |                      |               |             |                      |             |                 |                 |                  |                          |                   |               |            |
| 3 <sup>(1-6)</sup>                           | RCTs         | not serious          | not serious   | not serious | serious <sup>a</sup> | none        | 26/723 (3.6%)   | 29/508 (5.7%)   | 0.70 (0.45-1.09) | -16/1,000 (-31 to 5)     | ⊕⊕⊕○ MODERATE     | CRITICAL      |            |
| Exacerbations (follow-up period: 12 months)  |              |                      |               |             |                      |             |                 |                 |                  |                          |                   |               |            |
| 3 <sup>(1-6)</sup>                           | RCTs         | not serious          | not serious   | not serious | serious <sup>a</sup> | none        | 33/723 (4.6%)   | 45/508 (8.9%)   | 0.50 (0.31-0.79) | -42/1,000 (-59 to -17)   | ⊕⊕⊕○ MODERATE     | CRITICAL      |            |
| Adverse events (follow-up period: 12 months) |              |                      |               |             |                      |             |                 |                 |                  |                          |                   |               |            |
| 2 <sup>(1-6)</sup>                           | RCTs         | not serious          | not serious   | not serious | serious <sup>a</sup> | none        | 284/981 (29.0%) | 153/508 (30.1%) | 0.96 (0.55-1.56) | -9/1,000 (-110 to 101)   | ⊕⊕⊕○ MODERATE     | NOT IMPORTANT |            |
| Decline in FVC (follow-up period: 12 months) |              |                      |               |             |                      |             |                 |                 |                  |                          |                   |               |            |
| 3 <sup>(1-6)</sup>                           | RCTs         | not serious          | not serious   | not serious | not serious          | none        | 211/723 (29.2%) | 204/508 (40.2%) | 0.61 (0.48-0.78) | -111/1,000 (-158 to -58) | ⊕⊕⊕⊕ HIGH         | CRITICAL      |            |

RCTs: randomized clinical trials.

#### EXPLANATIONS

<sup>a</sup>The number of events did not reach the estimated optimal information size.

#### REFERENCES

- Canestaro WJ, Forrester SH, Raghu G, Ho L, Devine BE. Drug Treatment of Idiopathic Pulmonary Fibrosis: Systematic Review and Network Meta-Analysis. *Chest*. 2016;149(3):756-766. <https://doi.org/10.1016/j.chest.2015.11.013>
- Rodwerg B, Neupane B, Zhang Y, Garcia CC, Raghu G, Richeldi L, et al. Treatment of idiopathic pulmonary fibrosis: a network meta-analysis. *BMC Med*. 2016;14:18. <https://doi.org/10.1186/s12916-016-0558-x>
- Rogliani P, Calzetta L, Cavalli F, Matera MG, Cazzola M. Pirfenidone, nintedanib and N-acetylcysteine for the treatment of idiopathic pulmonary fibrosis: A systematic review and meta-analysis. *Pulm Pharmacol Ther*. 2016;40:95-103. <https://doi.org/10.1016/j.pupt.2016.07.009>
- Fleetwood K, McCool R, Glanville J, Edwards SC, Gsteiger S, Daigi M, et al. Systematic Review and Network Meta-analysis of Idiopathic Pulmonary Fibrosis Treatments. *J Manag Care Spec Pharm*. 2017;23(3-b Suppl):S5-S16. <https://doi.org/10.18553/jmcp.2017.23.3-b.s5>
- Jeldres A, Labarca G. Is nintedanib effective for idiopathic pulmonary fibrosis? *Medwave*. 2017;17(Suppl2):e6918. <https://doi.org/10.5867/medwave.2017.6918>
- Loveman E, Copley VR, Scott DA, Colquitt JL, Clegg AJ, O'Reilly KM. Comparing new treatments for idiopathic pulmonary fibrosis--a network meta-analysis. *BMC Pulm Med*. 2015;15:37. <https://doi.org/10.1186/s12890-015-0034-y>

**Table S2.** Summary of the quality of the evidence of the articles selected for question 2 (regarding the use of pirfenidone).

| Article, n                                          | Study design | Certainty assessment |                      |                      |                      | Patient, n/N | Placebo         | Effect size     |                  | Certainty | Importance    |
|-----------------------------------------------------|--------------|----------------------|----------------------|----------------------|----------------------|--------------|-----------------|-----------------|------------------|-----------|---------------|
|                                                     |              | Bias risk            | Inconsistency        | Indirect evidence    | Imprecision          |              |                 | Other remarks   | Pirfenidone      |           |               |
| <b>Mortality (follow-up period: 12 months)</b>      |              |                      |                      |                      |                      |              |                 |                 |                  |           |               |
| 3 <sup>(1-9)</sup>                                  | RCTs         | not serious          | not serious          | not serious          | serious <sup>a</sup> | none         | 22/623 (3.5%)   | 42/624 (6.7%)   | 0.53 (0.32-0.88) | ⊕⊕○○      | CRITICAL      |
| <b>Exacerbations (follow-up period: 12 months)</b>  |              |                      |                      |                      |                      |              |                 |                 |                  |           |               |
| 2 <sup>(1-9)</sup>                                  | RCTs         | not serious          | serious <sup>b</sup> | not serious          | serious <sup>a</sup> | none         | 6/235 (2.6%)    | 9/139 (6.5%)    | 0.59 (0.19-1.84) | ⊕⊕○○      | CRITICAL      |
| <b>Decline in FVC (follow-up period: 12 months)</b> |              |                      |                      |                      |                      |              |                 |                 |                  |           |               |
| 3 <sup>(1-9)</sup>                                  | RCTs         | not serious          | not serious          | not serious          | serious <sup>a</sup> | none         | 76/623 (12.2%)  | 112/624 (17.9%) | 0.64 (0.50-0.83) | ⊕⊕○○      | CRITICAL      |
| <b>Adverse events (follow-up period: 12 months)</b> |              |                      |                      |                      |                      |              |                 |                 |                  |           |               |
| 2 <sup>(1-9)</sup>                                  | RCTs         | not serious          | not serious          | serious <sup>c</sup> | serious <sup>a</sup> | none         | 165/623 (26.5%) | 165/624 (26.4%) | 1.0 (0.6-1.7)    | ⊕⊕○○      | NOT IMPORTANT |

RR: risk ratio; and RCTs: randomized clinical trials.

**EXPLANATIONS**

- <sup>a</sup>The number of events did not reach the estimated optimal information size.
- <sup>b</sup>High heterogeneity.
- <sup>c</sup>Different outcomes.

**REFERENCES**

1. Aravena C, Labarca G, Venegas C, Arenas A, Rada G. Pirfenidone for Idiopathic Pulmonary Fibrosis: A Systematic Review and Meta-Analysis *PLoS One*. 2015;10(8):e0136160. <https://doi.org/10.1371/journal.pone.0136160>
2. Aravena C, Labarca G, Venegas C, Arenas A, Rada G. Correction: Pirfenidone for Idiopathic Pulmonary Fibrosis: A Systematic Review and Meta-Analysis. *PLoS One*. 2015;10(10):e0140288 <https://doi.org/10.1371/journal.pone.0140288>
3. Ren H, Wang K, Yang H, Gao L. Efficacy and adverse events of pirfenidone in treating idiopathic pulmonary fibrosis. *Saudi Med J*. 2017;38(9):889-894. <https://doi.org/10.15537/smj.2017.9.19349>
4. Noble PW, Albera C, Bradford WZ, Costabel U, Glassberg MK, Kardatzke D, et al. Pirfenidone in patients with idiopathic pulmonary fibrosis (CAPACITY): two randomised trials. *Lancet*. 2011;377(9779):1760-1769. [https://doi.org/10.1016/S0140-6736\(11\)60405-4](https://doi.org/10.1016/S0140-6736(11)60405-4)
5. Spagnolo P, Del Giovane C, Luppi F, Cerri S, Balduzzi S, Walters EH, et al. Non-steroid agents for idiopathic pulmonary fibrosis. *Cochrane Database Syst Rev*. 2010;(9):CD003134. <https://doi.org/10.1002/14651858.CD003134.pub2>
6. Nathan SD, Albera C, Bradford WZ, Costabel U, Glaspole I, Glassberg MK, et al. Effect of pirfenidone on mortality: pooled analyses and meta-analyses of clinical trials in idiopathic pulmonary fibrosis [published correction appears in *Lancet Respir Med*. 2017 Jan;5(1):e7]. *Lancet Respir Med*. 2017;5(1):33-41. [https://doi.org/10.1016/S2213-2600\(16\)30326-5](https://doi.org/10.1016/S2213-2600(16)30326-5)
7. Rochwerg B, Neupane B, Zhang Y, Garcia CC, Raghu G, Richeldi L, et al. Treatment of idiopathic pulmonary fibrosis: a network meta-analysis. *BMC Med*. 2016;14:18. <https://doi.org/10.1186/s12916-016-0558-x>
8. Canestaro WJ, Forrester SH, Raghu G, Ho L, Devine BE. Drug Treatment of Idiopathic Pulmonary Fibrosis: Systematic Review and Network Meta-Analysis. *Chest*. 2016;149(3):756-766. <https://doi.org/10.1016/j.chest.2015.11.013>
9. Loveman E, Copley VR, Scott DA, Colquitt JL, Clegg AJ, O'Reilly KM. Comparing new treatments for idiopathic pulmonary fibrosis--a network meta-analysis. *BMC Pulm Med*. 2015;15:37. <https://doi.org/10.1186/s12890-015-0034-y>

**Table S3.** Summary of the quality of the evidence of the articles selected for question 3 (regarding the use of phosphodiesterase-5 inhibitors).

| Article, n                                            | Study design | Bias risk            | Certainty assessment | Indirect evidence         | Imprecision          | Other remarks | Phosphodiesterase-5 inhibitors | Placebo      | Relative OR (95% CI) | Effect size Absolute (95% CI)    | Certainty     | Importance |
|-------------------------------------------------------|--------------|----------------------|----------------------|---------------------------|----------------------|---------------|--------------------------------|--------------|----------------------|----------------------------------|---------------|------------|
| Mortality (follow-up period: 6 months)                |              |                      |                      |                           |                      |               |                                |              |                      |                                  |               |            |
| 1 <sup>(1,2)</sup>                                    | RCTs         | not serious          | not serious          | not serious               | serious <sup>a</sup> | none          | 3/103 (2,9%)                   | 9/106 (8,5%) | 0.29 (0.05-1.26)     | -59/1,000 (-80 to 20)            | ⊕⊕⊕○ MODERATE | CRITICAL   |
| Reduction in dyspnea (follow-up period: 12 weeks)     |              |                      |                      |                           |                      |               |                                |              |                      |                                  |               |            |
| 2 <sup>(1,2)</sup>                                    | RCTs         | serious <sup>b</sup> | not serious          | very serious <sup>c</sup> | serious <sup>a</sup> | none          | -/103                          | -/106        | not estimable        | 0/1,000 (-0 to 1) <sup>d</sup>   | ⊕○○○ VERY LOW | IMPORTANT  |
| Improved quality of life (follow-up period: 12 weeks) |              |                      |                      |                           |                      |               |                                |              |                      |                                  |               |            |
| 1 <sup>(1,2)</sup>                                    | RCTs         | serious <sup>b</sup> | not serious          | very serious <sup>c</sup> | serious <sup>a</sup> | none          | -/89                           | -/91         | not estimable        | -3/1,000 (-5 to -1) <sup>d</sup> | ⊕○○○ VERY LOW | IMPORTANT  |

RCTs: randomized clinical trials.

#### EXPLANATIONS

<sup>a</sup>The number of events did not reach the estimated optimal information size.

<sup>b</sup>Quasi-randomized studies, high bias risk.

<sup>c</sup>Different study populations.

<sup>d</sup>Estimates obtained from a systematic review

#### REFERENCES

1. Rochwerg B, Neupane B, Zhang Y, Garcia CC, Raghu G, Richeldi L, et al. Treatment of idiopathic pulmonary fibrosis: a network meta-analysis. BMC Med. 2016;14:18. <https://doi.org/10.1186/s12916-016-0558-x>
2. Bajwah S, Ross JR, Peacock JL, Higginson IJ, Wells AU, Patel AS, et al. Interventions to improve symptoms and quality of life of patients with fibrotic interstitial lung disease: a systematic review of the literature. Thorax. 2013;68(9):867-879. <https://doi.org/10.1136/thoraxjnl-2012-202040>



**Table S4.** Summary of the quality of the evidence of the articles selected for question 4 (regarding the use of endothelin-receptor antagonists).

| Article, n                                                         | Study design | Certainty assessment |               |               | Indirect evidence    | Imprecision | Other remarks  | Endothelin-receptor antagonists | Patient, n/N     | Placebo                 | Relative OR (95% CI) | Effect size Absolute (95% CI) | Certainty | Importance |
|--------------------------------------------------------------------|--------------|----------------------|---------------|---------------|----------------------|-------------|----------------|---------------------------------|------------------|-------------------------|----------------------|-------------------------------|-----------|------------|
|                                                                    |              | Bias risk            | Inconsistency | Inconspicuous |                      |             |                |                                 |                  |                         |                      |                               |           |            |
| <b>Ambrisentan - Mortality (follow-up period: 12 months)</b>       |              |                      |               |               |                      |             |                |                                 |                  |                         |                      |                               |           |            |
| 1 <sup>(1,2)</sup>                                                 | RCTs         | serious <sup>a</sup> | not serious   | not serious   | serious <sup>a</sup> | none        | 26/329 (7.9%)  | 6/163 (3.7%)                    | 2.33 (0.99-6.25) | 45/1,000 (-0 to 156)    | ⊕⊕○○ LOW             | CRITICAL                      |           |            |
| <b>Bosentan - Mortality (follow-up period: 12 months)</b>          |              |                      |               |               |                      |             |                |                                 |                  |                         |                      |                               |           |            |
| 2 <sup>(1,2)</sup>                                                 | RCTs         | not serious          | not serious   | not serious   | serious <sup>b</sup> | none        | 20/481 (4.2%)  | 10/293 (3.4%)                   | 1.02 (0.52-2.08) | 1/1,000 (-16 to 34)     | ⊕⊕⊕○ MODERATE        | CRITICAL                      |           |            |
| <b>Macitentan - Mortality (follow-up period: 12 months)</b>        |              |                      |               |               |                      |             |                |                                 |                  |                         |                      |                               |           |            |
| 1 <sup>(1,2)</sup>                                                 | RCTs         | not serious          | not serious   | not serious   | serious <sup>b</sup> | none        | 8/119 (6.7%)   | 4/59 (6.8%)                     | 1.18 (0.35-5.00) | 11/1,000 (-43 to 199)   | ⊕⊕⊕○ MODERATE        | CRITICAL                      |           |            |
| <b>Ambrisentan - Adverse effects (follow-up period: 12 months)</b> |              |                      |               |               |                      |             |                |                                 |                  |                         |                      |                               |           |            |
| 1 <sup>(1,2)</sup>                                                 | RCTs         | serious <sup>a</sup> | not serious   | not serious   | serious <sup>b</sup> | none        | 73/329 (22.2%) | 25/163 (15.3%)                  | 1.60 (0.73-3.52) | 71/1,000 (-37 to 236)   | ⊕⊕○○ LOW             | NOT IMPORTANT                 |           |            |
| <b>Bosentan - Adverse effects (follow-up period: 12 months)</b>    |              |                      |               |               |                      |             |                |                                 |                  |                         |                      |                               |           |            |
| 2 <sup>(1,2)</sup>                                                 | RCTs         | not serious          | not serious   | not serious   | serious <sup>b</sup> | none        | 22/781 (2.8%)  | 29/293 (9.9%)                   | 0.84 (0.48-1.44) | -14/1,000 (-49 to 38)   | ⊕⊕⊕○ MODERATE        | NOT IMPORTANT                 |           |            |
| <b>Macitentan - Adverse effects (follow-up period: 12 months)</b>  |              |                      |               |               |                      |             |                |                                 |                  |                         |                      |                               |           |            |
| 1 <sup>(1,2)</sup>                                                 | RCTs         | not serious          | not serious   | not serious   | serious <sup>b</sup> | none        | 37/119 (31.1%) | 20/59 (33.9%)                   | 0.87 (0.35-2.17) | -30/1,000 (-187 to 188) | ⊕⊕⊕○ MODERATE        | NOT IMPORTANT                 |           |            |

RCTs: randomized clinical trials.

**EXPLANATIONS**

<sup>a</sup>The number of events in the intervention group was greater than that in the placebo group; the study had to be interrupted.

<sup>b</sup>The number of events did not reach the estimated optimal information size.

**REFERENCES**

1. Canestaro WJ, Forrester SH, Raghu G, Ho L, Devine BE. Drug Treatment of Idiopathic Pulmonary Fibrosis: Systematic Review and Network Meta-Analysis. *Chest*. 2016;149(3):756-766. <https://doi.org/10.1016/j.chest.2015.11.013>
2. Rochwerg B, Neupane B, Zhang Y, Garcia CC, Raghu G, Richeldi L, et al. Treatment of idiopathic pulmonary fibrosis: a network meta-analysis. *BMC Med*. 2016;14:18. <https://doi.org/10.1186/s12916-016-0558-x>

**Table S5.** Summary of the quality of the evidence of the articles selected for question 5 (regarding the routine pharmacological treatment of gastroesophageal reflux).

| Article, n | Study design                                  | Bias risk | Certainty assessment |             |               | Patient, n/N | Pharmacological treatment of gastroesophageal reflux | Placebo | Other remarks | Imprecision | Indirect evidence | Effect size   | Relative (95% CI) | Absolute (95% CI) | Certainty | Importance |
|------------|-----------------------------------------------|-----------|----------------------|-------------|---------------|--------------|------------------------------------------------------|---------|---------------|-------------|-------------------|---------------|-------------------|-------------------|-----------|------------|
|            |                                               |           | Inconsistency        | Imprecision | Other remarks |              |                                                      |         |               |             |                   |               |                   |                   |           |            |
|            | Mortality (follow-up period: 12 months)       |           |                      |             |               |              |                                                      |         |               |             |                   |               |                   |                   |           |            |
|            | observational study                           |           |                      |             |               |              |                                                      |         |               |             |                   | not estimable |                   |                   | -         | CRITICAL   |
|            | Hospitalization (follow-up period: 12 months) |           |                      |             |               |              |                                                      |         |               |             |                   |               |                   |                   |           |            |
|            | observational study                           |           |                      |             |               |              |                                                      |         |               |             |                   | not estimable |                   |                   | -         | CRITICAL   |
|            | Decline in FVC (follow-up period: 12 months)  |           |                      |             |               |              |                                                      |         |               |             |                   |               |                   |                   |           |            |
|            | observational study                           |           |                      |             |               |              |                                                      |         |               |             |                   | not estimable |                   |                   | -         | CRITICAL   |
|            | Exacerbations (follow-up period: 30 weeks)    |           |                      |             |               |              |                                                      |         |               |             |                   |               |                   |                   |           |            |
|            | observational study                           |           |                      |             |               |              |                                                      |         |               |             |                   | not estimable |                   |                   | -         | CRITICAL   |

**Table S6.** Summary of the quality of the evidence of the articles selected for question 6 (regarding the use of N-acetylcysteine).

| Article, n                                   | Study design | Certainty assessment |                      |                   | Other remarks        | N-acetylcysteine Patient, n/N | Placebo (5.7%) | Effect size   |                      | Certainty             | Importance    |                   |
|----------------------------------------------|--------------|----------------------|----------------------|-------------------|----------------------|-------------------------------|----------------|---------------|----------------------|-----------------------|---------------|-------------------|
|                                              |              | Bias risk            | Inconsistency        | Indirect evidence |                      |                               |                | Imprecision   | Relative OR (95% CI) |                       |               | Absolute (95% CI) |
| Mortality (follow-up period: 12 months)      |              |                      |                      |                   |                      |                               |                |               |                      |                       |               |                   |
| 4 <sup>(1-5)</sup>                           | RCTs         | not serious          | not serious          | not serious       | serious <sup>a</sup> | none                          | 15/284 (5.3%)  | 16/282 (5.7%) | 0.84 (0.20-4.50)     | -9/1,000 (-45 to 156) | ⊕⊕⊕○ MODERATE | CRITICAL          |
| Decline in FVC (follow-up period: 12 months) |              |                      |                      |                   |                      |                               |                |               |                      |                       |               |                   |
| 1 <sup>(1-5)</sup>                           | RCTs         | serious <sup>b</sup> | serious <sup>c</sup> | not serious       | not serious          | none                          |                |               | not estimable        |                       | ⊕⊕○○ LOW      | CRITICAL          |

RCTs: randomized clinical trials.

**EXPLANATIONS**

<sup>a</sup>The number of events did not reach the estimated optimal information size.

<sup>b</sup>Study with a relevant bias risk.

<sup>c</sup>Heterogeneity.

**REFERENCES**

1. Rochwerg B, Neupane B, Zhang Y, Garcia CC, Raghun G, Richeldi L, et al. Treatment of idiopathic pulmonary fibrosis: a network meta-analysis. *BMC Med.* 2016;14:18. <https://doi.org/10.1186/s12916-016-0558-x>
2. Sun T, Liu J, Zhao de W. Efficacy of N-Acetylcysteine in Idiopathic Pulmonary Fibrosis: A Systematic Review and Meta-Analysis. *Medicine (Baltimore).* 2016;95(19):e3629. <https://doi.org/10.1097/MD.0000000000003629>
3. Kandhare AD, Mukherjee A, Ghosh P, Bodhankar SL. Efficacy of antioxidant in idiopathic pulmonary fibrosis: A systematic review and meta-analysis. *EXCLI J.* 2016;15:636-651. <https://doi.org/10.17179/excli2016-619>
4. Canestaro WJ, Forrester SH, Raghun G, Ho L, Devine BE. Drug Treatment of Idiopathic Pulmonary Fibrosis: Systematic Review and Network Meta-Analysis. *Chest.* 2016;149(3):756-766. <https://doi.org/10.1016/j.chest.2015.11.013>
5. Loveman E, Copley VR, Scott DA, Colquitt JL, Clegg AJ, O'Reilly KM. Comparing new treatments for idiopathic pulmonary fibrosis--a network meta-analysis. *BMC Pulm Med.* 2015;15:37. <https://doi.org/10.1186/s12890-015-0034-y>

**Table S7.** Summary of the quality of the evidence of the articles selected for question 7 (regarding the use of corticosteroids).

| Article, n | Study design | Bias risk | Certainty assessment | Inconsistence | Indirect evidence | Imprecision | Other remarks | Corticosteroids | Placebo | Patient, n/N | Effect size | Relative (95% CI) | Absolute (95% CI) | Certainty | Importance |          |
|------------|--------------|-----------|----------------------|---------------|-------------------|-------------|---------------|-----------------|---------|--------------|-------------|-------------------|-------------------|-----------|------------|----------|
|            |              |           |                      |               |                   |             |               |                 |         |              |             |                   |                   |           |            |          |
|            |              |           |                      |               |                   |             |               |                 |         |              |             | not estimable     |                   | -         |            | CRITICAL |
|            |              |           |                      |               |                   |             |               |                 |         |              |             | not estimable     |                   | -         |            | CRITICAL |
